# Supplementary material
Source: publisher figshare collection journal article supplement (https://adisjournals.figshare.com/articles/dataset/_/9902078)
Supplement: Supplementary file 1 [file 4]

# Collaborative design of a new delivery system: understanding different perspectives to optimise patient care

Research was completed to develop a new syringe that made injection of lanreotide autogel/depot easier than with the syringe available at the time.

## Step 1: Consultation

Patients, caregivers and healthcare professionals were asked what improvements they would like to see made to the syringe.

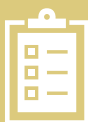

### Feedback was collected on:

- the existing syringe
- different prototypes that were modified progressively

### 4 formative studies were completed

21 patients with GEP-NETs

34 patients with acromegaly

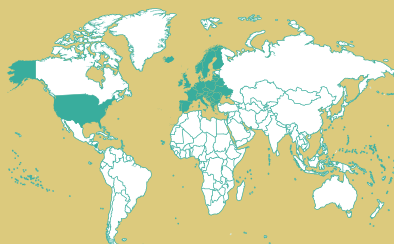

74 healthcare professionals

3 caregivers

## Step 2: Collaborative re-design

Based on the feedback received, improvements were made to the syringe design:

Thermoformed tray added to protect syringe before use

The needle cap is now ridged, and bigger\* to help facilitate removal

### Attributes:

- Improves handling
- Restricts needle visibility
- Ease of use
- Increases sturdiness

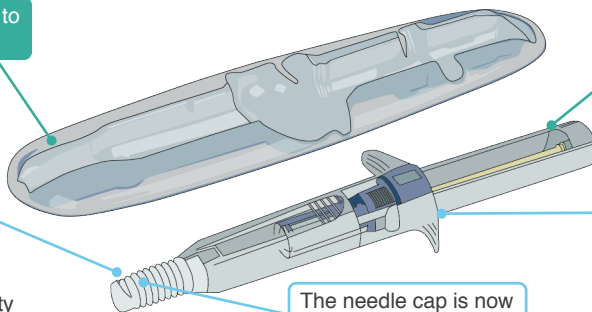

Plunger supports added

The flanges are larger\* and are now curved with a textured grip

The needle cap is now white and opaque

\*vs the previous syringe

## Step 3: Assessment and validation

All participants succeeded in delivering an injection properly and safely in the intended environment for the intended use.

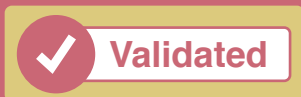

### Validation study

35 US healthcare professionals  
(16 trained, 19 untrained)

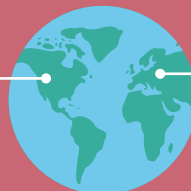

33 European representatives of patients and caregivers

## Conclusion

- The updated syringe met the aim of improving the lanreotide autogel/depot injection experience versus the currently available syringe
  - It is anticipated that these improvements will enhance patient care<sup>1-3</sup>
- Patient experience with the new syringe will be further assessed
